1 **Improved *Apis mellifera* reference genome based on the alternative long-read-based**  
2 **assemblies**

3

4 Milyausha Kaskinova<sup>\*2</sup>, Bayazit Yunusbayev<sup>†,‡<sup>2</sup></sup>, Radick Altinbaev<sup>§</sup>, Rika Raffiudin<sup>\*\*</sup>,  
5 Madeline H. Carpenter<sup>‡‡</sup>, Alexey Nikolenko<sup>\*</sup>, Brock A. Harpur<sup>‡‡</sup>, Ural Yunusbayev<sup>\*1</sup>

6

7 <sup>\*</sup>Institute of Biochemistry and Genetics, Ufa Federal Research Center of Russian Academy of  
8 Sciences, Ufa, 450054, Russia

9 <sup>†</sup>SCAMT Institute, ITMO University, Saint-Petersburg, 191002, Russia

10 <sup>‡</sup>Institute of Genomics, University of Tartu, Tartu, 51010, Estonia

11 <sup>§</sup>Institute of Higher Nervous Activity and Neurophysiology, Russian Academy of Sciences,  
12 Moscow, 117485, Russia

13 <sup>\*\*</sup>Department of Biology, Faculty of Mathematics and Natural Sciences, IPB University,  
14 Bogor, 16680, Indonesia

15 <sup>‡‡</sup>Department of Entomology, Purdue University, West Lafayette, IN, 47907, USA

16

17 ORCID IDs: 0000-0003-4960-6559 (M.K.); 0000-0002-6035-8763 (B.Y.); 0000-0002-7076-  
18 5653 (R.A.); 0000-0002-5373-9445 (R.R.); 0000-0001-8074-6934 (M.H.C); 0000-0002-  
19 9235-680X (A.N.); 0000-0001-8722-272X (B.A.H.); 0000-0003-0666-4118 (U.Y.)

20 Short running title: Amel\_ref\_improved

21

22 Keywords: *Apis mellifera*, genome assembly, gap closing, scaffold positioning, telomere  
23 resolving, reference genome, chromosome assembly, PacBio, long reads

24

25 Supplemental material available at: <https://figshare.com/s/c8d6c0291893405d4409>.

26

27 <sup>1</sup>Corresponding author: Institute of Biochemistry and Genetics, Ufa Federal Research Center  
28 of Russian Academy of Sciences, 71 pr.Oktyabrya, 450054, Ufa, Russia, E-mail:  
29 uralub@gmail.com

30

31 <sup>2</sup>These authors contributed equally to this work.

32

### 33 **ABSTRACT**

34 *Apis mellifera* L., the western honey bee is a major crop pollinator that plays a key role in  
35 beekeeping and serves as an important model organism in social behavior studies. Recent  
36 efforts have improved on the quality of the honey bee reference genome and developed a  
37 chromosome-level assembly of sixteen chromosomes, two of which are gapless. However, the  
38 rest suffer from 51 gaps, 160 unplaced/unlocalized scaffolds, and the lack of 2 distal  
39 telomeres. The gaps are located at the hard-to-assemble extended highly repetitive  
40 chromosomal regions that may contain functional genomic elements. Here, we use *de-novo*  
41 re-assemblies from the most recent reference genome Amel\_HAv\_3.1 raw reads and other  
42 long-read-based assemblies (INRA\_AMelMel\_1.0, ASM1384120v1, and ASM1384124v1) of  
43 the honey bee genome to resolve 13 gaps, five unplaced/unlocalized scaffolds and, the lacking  
44 telomeres of the Amel\_HAv\_3.1. The total length of the resolved gaps is 848,747 bp. The  
45 accuracy of the corrected assembly was validated by mapping PacBio reads and performing  
46 gene annotation assessment. Comparative analysis suggests that the PacBio-reads-based  
47 assemblies of the honey bee genomes failed in the same highly repetitive extended regions of  
48 the chromosomes, especially on chromosome 10. To fully resolve these extended repetitive  
49 regions, further work using ultra-long Nanopore sequencing would be needed. Our updated  
50 assembly facilitates more accurate reference-guided scaffolding and marker/sequence  
51 mapping in honey bee genomics studies.

## 52 INTRODUCTION

53 An accurate reference genome is an important starting point in translating an organism's  
54 genomic information to its function at the molecular, cellular, and organismal levels. The  
55 genome of the western honey bee (*Apis mellifera* L., henceforth honey bee) has been a boon  
56 to our understanding of genomics in insect and eusocial species (Honeybee Genome  
57 Sequencing Consortium 2006; Harpur *et al.* 2019). The original reference genome (Honeybee  
58 Genome Sequencing Consortium 2006) was recently updated (Wallberg *et al.* 2019),  
59 providing to the community a chromosome-level assembly that is more contiguous and  
60 complete than the previous reference assembly (Elsik *et al.* 2014). Unfortunately, it still has a  
61 number of issues that hinder downstream genomic inferences. Specifically, the new reference  
62 has 51 unsolved genomic gaps, 2 lacking distal telomeres (Figure 1), and 160  
63 unplaced/unlocalized scaffolds. There are 17 arbitrary gaps of 25 and 200 bp in the  
64 Amel\_HAv\_3.1, and the remaining varies from 393 to 345,148 bp. There are 14 gaps located  
65 within the genes of the Amel\_HAv\_3.1. The distal telomeres of the Amel\_HAv\_3.1 are  
66 assembled, except for chromosomes 5 and 11. In addition to these gaps, there are several  
67 problematically assembled regions in chromosomes 3, 6, 7, 10, and 11, which demonstrate  
68 significantly higher levels of reads coverage variation (Figure 1).

69 Identifying the sequences that fill the genomic gaps could facilitate the discovery of  
70 novel genomic features in the honey bee genome that can lead to important biological insights  
71 and would improve downstream genomic analysis. For example, closed gaps in the human  
72 reference genome were found to be enriched in repetitive elements and contain functional  
73 genomic elements (Zhao *et al.* 2020). There has been considerable progress in developing gap  
74 closing methods in the past decade, such as methods based on the local assembly approach  
75 (English *et al.* 2012; Bayega *et al.* 2020; Miga *et al.* 2020) and the assembly-to-assembly  
76 approach (Thomma *et al.* 2016; Shi *et al.* 2016; Zhao *et al.* 2020). These methodological  
77 advancements allowed significant progress in resolving gaps in the human reference genome.  
78 Unlike the progress with the human genome, there are still issues regarding the gaps in the  
79 honey bee reference.

80 Here, we sought to improve the current assembly by filling in the remaining gaps and  
81 developing a telomere-to-telomere chromosomal reference sequence. We use two *de-novo* re-  
82 assemblies from Amel\_HAv\_3.1 PacBio reads, referred to as "re-assemblies", and three *de-*  
83 *novo* assemblies from PacBio reads derived from different honey bee subspecies, referred to  
84 as "alternative assemblies", to improve the honey bee reference genome Amel\_HAv\_3.1.

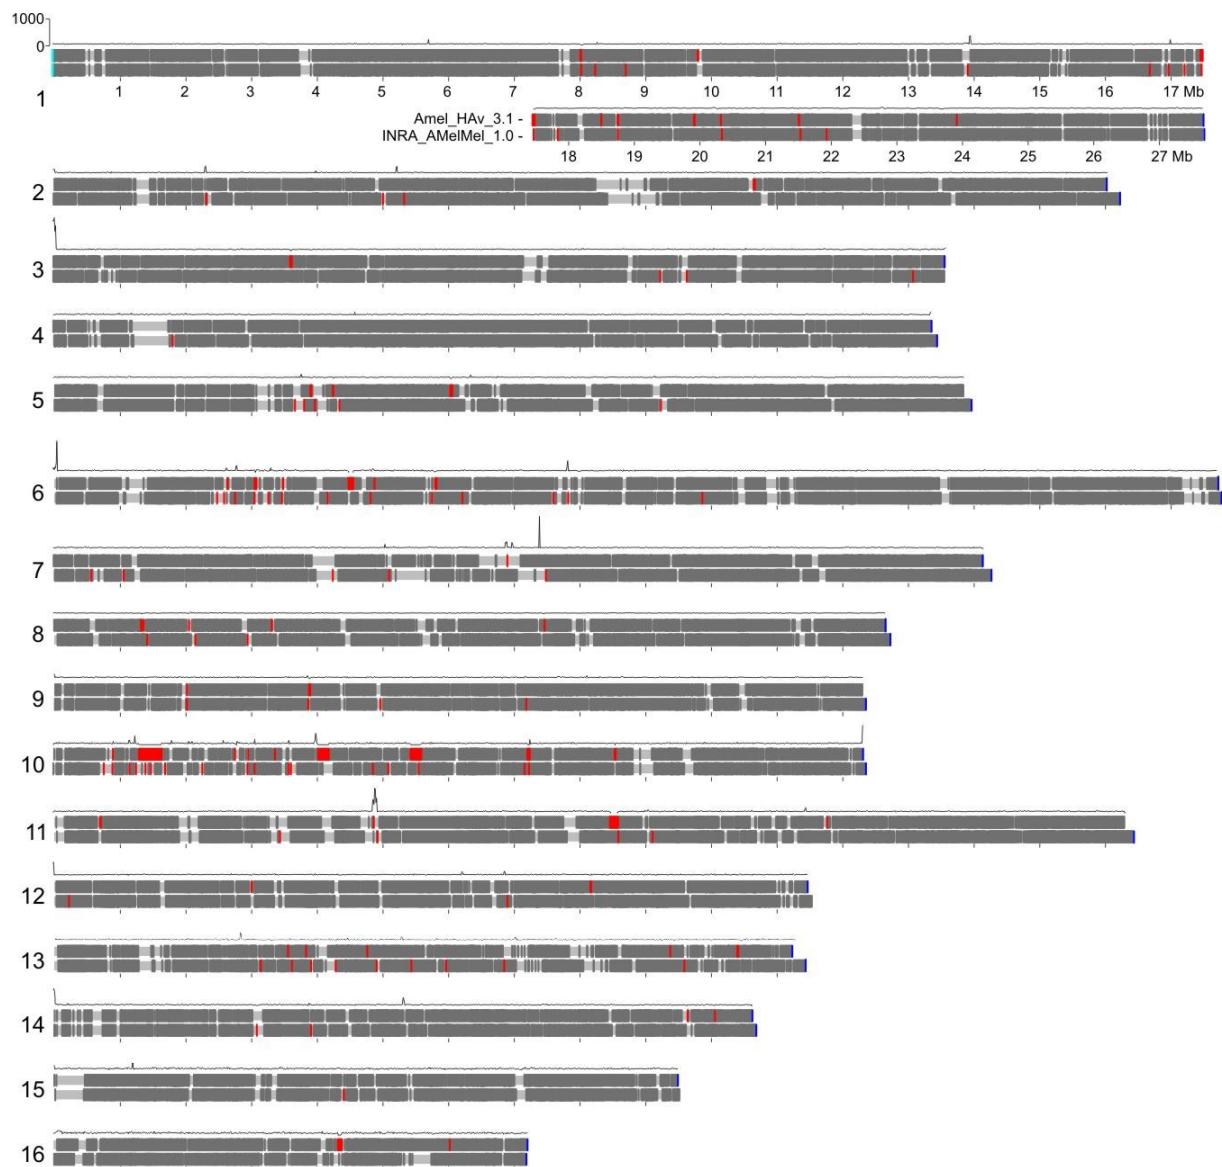

85  
86 **Figure 1** Ideograms of two assemblies of the *A. mellifera* genome Amel\_HAv\_3.1 (upper)  
87 and Amel\_INRA\_1.0 (lower) with the mapped genes (dark gray), telomeric TTAGG (blue)  
88 and CCTAA (cyan) motifs, polyN gaps (red), and Amel\_HAv\_3.1's PacBio reads coverage  
89 (black curve).

90

## 91 MATERIALS AND METHODS

92 Our method (Figure 2A) utilizes five genomic datasets including the current version of  
93 the honey bee reference (Amel\_HAv\_3.1), two *de novo* re-assemblies of the reference, and  
94 three non-reference alternative *de novo* genome assemblies derived from the different *A.*  
95 *mellifera* subspecies (see "Genomic data" section below). First, we identified the coordinates  
96 of the gaps and the genes flanking them in the Amel\_HAv\_3.1 reference genome. Then, we  
97 determined the flanking genes' positions in alternative assemblies. The flanking genes were

98 used as markers to find and extract the Gap Closing Sequences (GCS) from the alternative  
99 assemblies (Figure 2B). Next, we selected candidate GCSs that demonstrate the best  
100 alignment to the corresponding gap region. In addition, for each filled gap, we verified  
101 whether the PacBio raw reads from the Amel\_HAv\_3.1 are properly aligned to the region. If  
102 they were not, we discarded the tested GCS. All the gaps filled in our study were carefully  
103 curated manually. We also positioned unplaced scaffolds and restored lacking telomeres by  
104 comparing gene coordinates in different assemblies. All the redundant sequences were  
105 removed from the corrected assembly. Finally, we evaluated and validated the  
106 corrected\_Amel\_HAv\_3.1.

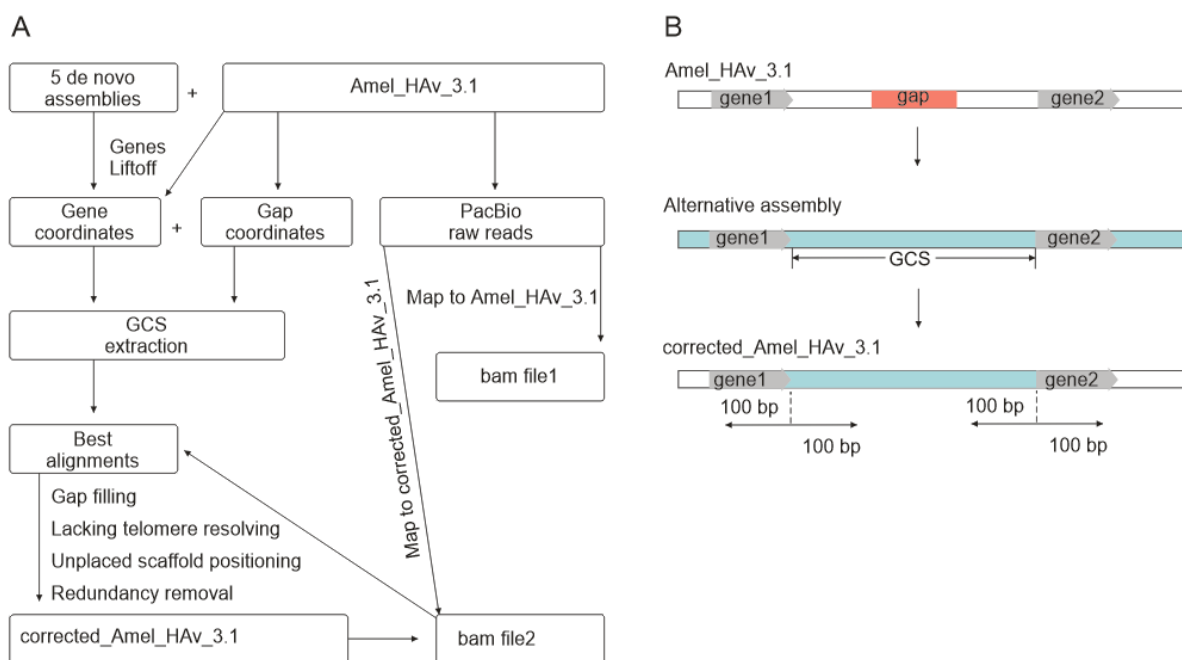

107

108 **Figure 2** Workflow of our approach to identify and validate Gap Closing Sequences (GCSs)  
109 (A), (B) Schematic of our gap-closing approach that was used to improve the *A. mellifera*  
110 reference genome Amel\_HAv\_3.1.

111

## 112 Genomic data

113 The Amel\_HAv\_3.1 *reference genome* (Wallberg *et al.* 2019) along with raw reads  
114 were downloaded from NCBI (Table S1).

115 *Reference de novo re-assemblies* were built out of Amel\_HAv\_3.1 raw reads using  
116 two assemblers: Flye v2.8 (Kolmogorov *et al.* 2019) and NextDenovo v2.3.1  
117 (<https://github.com/Nextomics/NextDenovo>). Default parameters were used except where  
118 stated. All the commands and parameters used for each tool are given in Table S2. The re-  
119 assembled contigs were ordered and oriented in RaGOO (Alonge *et al.* 2019) using

120 Amel\_HAv\_3.1 as a reference. The assemblies were polished in NextPolish (Hu *et al.* 2020)  
121 using PacBio and Illumina reads. The re-assemblies from the Flye and NextDenovo are  
122 referred to as Amel\_HAv3\_1\_reFlye and Amel\_HAv3\_1\_reND, respectively.

123 *Non-reference de novo alternative assemblies* based on SMRT PacBio long reads for  
124 *A. m. mellifera* (Assembly: INRA\_AMelMel\_1.0; NCBI Bioproject: PRJNA450801), *A. m.*  
125 *carnica* (ASM1384124v1, PRJNA644991), and *A. m. caucasica* (ASM1384120v1,  
126 PRJNA645012) were downloaded from NCBI. All assemblies based on PacBio reads were  
127 required to have coverage higher than 100.0x. To achieve chromosome-scale assembly, the  
128 ASM1384120v1 contigs were re-scaffolded using RaGOO and Amel\_HAv\_3.1 as a  
129 reference. The INRA\_AMelMel\_1.0 and ASM1384124v1 chromosome-scale assemblies were  
130 used as is.

### 131 **Gap-closing**

132 We used genes that flank reference gaps as markers to find and extract GCSs from the  
133 alternative assemblies (Figure 2). For this, we mapped genes from the Amel\_HAv\_3.1  
134 reference assembly to the alternative assemblies. Ordering and orientation of the genes were  
135 compared between these alternative assemblies and Amel\_HAv\_3.1 (Table S3.1-3.6). Next,  
136 we found GCSs in the queried alternative assemblies. Then, we generated three files using  
137 BEDTOOLS: (1) a fasta file of the reference genome Amel\_HAv\_3.1 with deleted gap  
138 regions. Gap regions were deleted from the genome based on the end (or start) position of the  
139 terminal gene, flanking the gap upstream, and start (or end) position of the first gene, flanking  
140 the gap downstream; (2) a fasta file with the GCSs from the gap-closing assembly. GCSs  
141 were also retrieved from assemblies based on the positions of the gap-flanking genes. If the  
142 gap in the reference genome was located within the gene, we pasted this gene from another  
143 assembly that contained the complete sequence of the gene; (3) a fasta file with the genomic  
144 region flanking the start and end positions of the GCS. We extracted 100 bp fragments located  
145 upstream and downstream of each GCS and aligned them to the reference assembly to check  
146 that ends of the GCSs correspond to sequences in the reference genome. The fasta files (1)  
147 and (2) were merged and GCSs were pasted in corresponding regions manually. To validate  
148 GCSs, we aligned the 200 bp fragments located upstream and downstream of each GCS to the  
149 reference assembly (Figure 2B). Then, we mapped Pacbio raw reads to the corrected  
150 Amel\_HAv\_3.1 and calculated genome coverage. The same approach was used to recover  
151 telomeres in chromosomes 5 and 11.



## 152 **Gene annotation liftoff**

153 We used the Liftoff software (Shumate and Salzberg 2020) to map the genes from the  
154 Amel\_HAv\_3.1 reference to the re-assembled and alternative assemblies.

## 155 **Assembly assessment**

156 Assembly statistics were computed using Quast (Table S4). We used BUSCO v. 4.1.2  
157 (Waterhouse *et al.* 2019) and Liftoff to assess gene sets in honey bee assemblies. Minimap2  
158 (Li 2018) was used to map Pacbio reads to the initial and corrected Amel\_HAv\_3.1 assembly  
159 (minimap2 -ax map-pb). To calculate genome coverage, we used CLC Genomics Workbench  
160 20.0 (<https://digitalinsights.qiagen.com>) and Samtools (samtools depth -a,  
161 <https://www.htslib.org/>).

## 162 **Computing resources**

163 All the programs were run on the WorkStation HP Z-series and Dell PowerEdge T-  
164 series with 6 core processors and 196Gb RAM in total. Also, we used the public server at  
165 usegalaxy.org (Sloggett *et al.* 2013) to run BUSCO and Quast.

## 166 **Data availability**

167 The assembly generated in this study and supplementary materials are available at the  
168 Figshare repository from <https://figshare.com/s/c8d6c0291893405d4409>.

169

## 170 **RESULTS AND DISCUSSION**

### 171 **Gap-closing in the Amel\_HAv\_3.1 reference genome**

172 We selected 11 GCSs from the two Amel\_HAv\_3.1 re-assemblies and three long-read  
173 alternative assemblies. In case of choice between the re-assembled Amel\_HAv\_3.1 and  
174 alternative assemblies, we preferred the first one. And in case of choice between alternative  
175 assemblies, we selected the one that gave the best genome coverage with PacBio reads.

176 Altogether, we closed 9 gaps in the Amel\_HAv\_3.1 reference using our re-assembly  
177 approach: gaps 4, 6, 8, and 9 in chromosome 1; gap 1 in chromosome 2; gaps 3 and 4 in  
178 chromosome 8; gaps 1 and 2 in chromosome 16. Five of these closed gaps were located  
179 within genes and three gaps were in intergenic regions. We also found that the gap 4 in  
180 chromosome 1 arose due to low sequencing coverage in the region.

181 We found that the gap-containing regions that we processed using our GCSs were  
182 enriched for repeats (Figure S1). These repetitive elements probably hindered previous  
183 assemblies and resulted in gaps. In these regions, we observed discrepancies in the ordering  
184 and orientation of the genes for different assemblies (Figures S2.1 and S2.1a). The details of  
185 the remaining gaps that we corrected in this study are given in Supplementary (Figures S2.2-

186 2.10). In Figure 3, we show the corrected exon-intron structure of the LOC410785 gene  
187 before and after the gap closing.

188 We failed to close some of the gaps using re-assembled Amel\_HAV3\_1 contigs alone.  
189 In such cases, we used sequences derived from the alternative assemblies  
190 INRA\_AMelMel\_1.0., ASM1384120v1 and ASM1384124v1. This allowed us to close two  
191 additional gaps. One of them is gap 2 of chromosome 1, which is located between  
192 LOC409701 and LOC113218996. For this gap, the GCSs were found in three alternative  
193 assemblies INRA\_AMelMel\_1.0., ASM1384120v1 and ASM1384124v1. These GCSs were  
194 aligned using the Kalign tool implemented in the Unipro UGENE (Okonechnikov *et al.*  
195 2012). It should be noted that the GCSs from the ASM1384120v1 and ASM1384124v1 had  
196 the same repeat patterns, but minor sequence differences (UGENE Dotplot). Therefore, we  
197 selected GCSs from INRA\_AMelMel\_1.0 and ASM1384124v1 to create two corrected  
198 versions (Figure 4). To select one of them, we mapped PacBio reads using Minimap2 and  
199 found that the coverage in the ASM1384124v1 GCS was higher. We used this higher  
200 coverage version to close the gap. We then applied this approach to select the GCS for gap 1  
201 in chromosome 3 (GCS source is ASM1384120v1). Details on genome coverage are given in  
202 Table S5.

### 203 **Positioning unplaced scaffolds**

204 There are 11 chromosomes in Amel\_HAV\_3.1 that have unlocalized scaffolds and 43  
205 unplaced/unlocalized scaffolds have genes. We determined the coordinates of these genes in  
206 the alternative assemblies. If the gene location, ordering, and orientation matched in more  
207 than two assemblies, we considered it to be the true location in the genome. Using this  
208 approach, we localized four unplaced scaffolds of the reference genome: NW\_020555794.1  
209 (40,528 bp, associated with chromosome 8, Figure 5), NW\_020555815.1, and  
210 NW\_020555816.1 (67,913 and 40,431 bp respectively, both associated with chromosome 10,  
211 Figure S2.9. and 3), and NW\_020555860 (311,923 bp, Figure S6). Notably, two of these  
212 unlocalized scaffolds overlapped the gaps. The NW\_020555794.1 closed the gap 1 in  
213 chromosome 8, and the NW\_020555815.1 closed the gap 6 in chromosome 10 (Figure 5). The  
214 unplaced scaffold NW\_020555860 along with the GCS from the corresponding alternative  
215 assembly was used to recover the proximal end of chromosome 16. We then mapped  
216 unlocalized scaffolds to the corrected reference using Minimap2 to validate their positioning.  
217



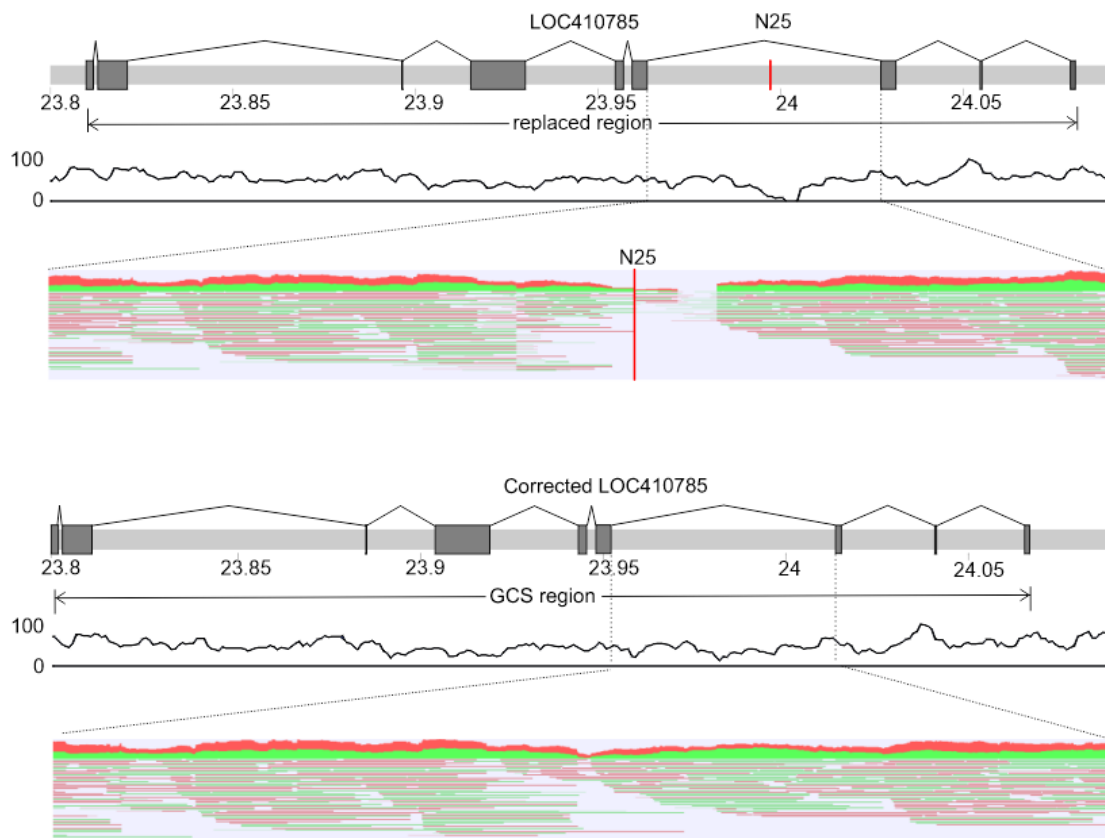

218

219 **Figure 3** Gap-closing sequence from re-assembled Amel\_HAv3\_1 for gap 9 (N25) of  
220 chromosome 1. Exons are marked in dark gray. The red line N25 represents the gap. The  
221 black curve under the chromosomes shows PacBio reads coverage. Red-green hatching shows  
222 alignments of long PacBio reads to the zoomed region.

223

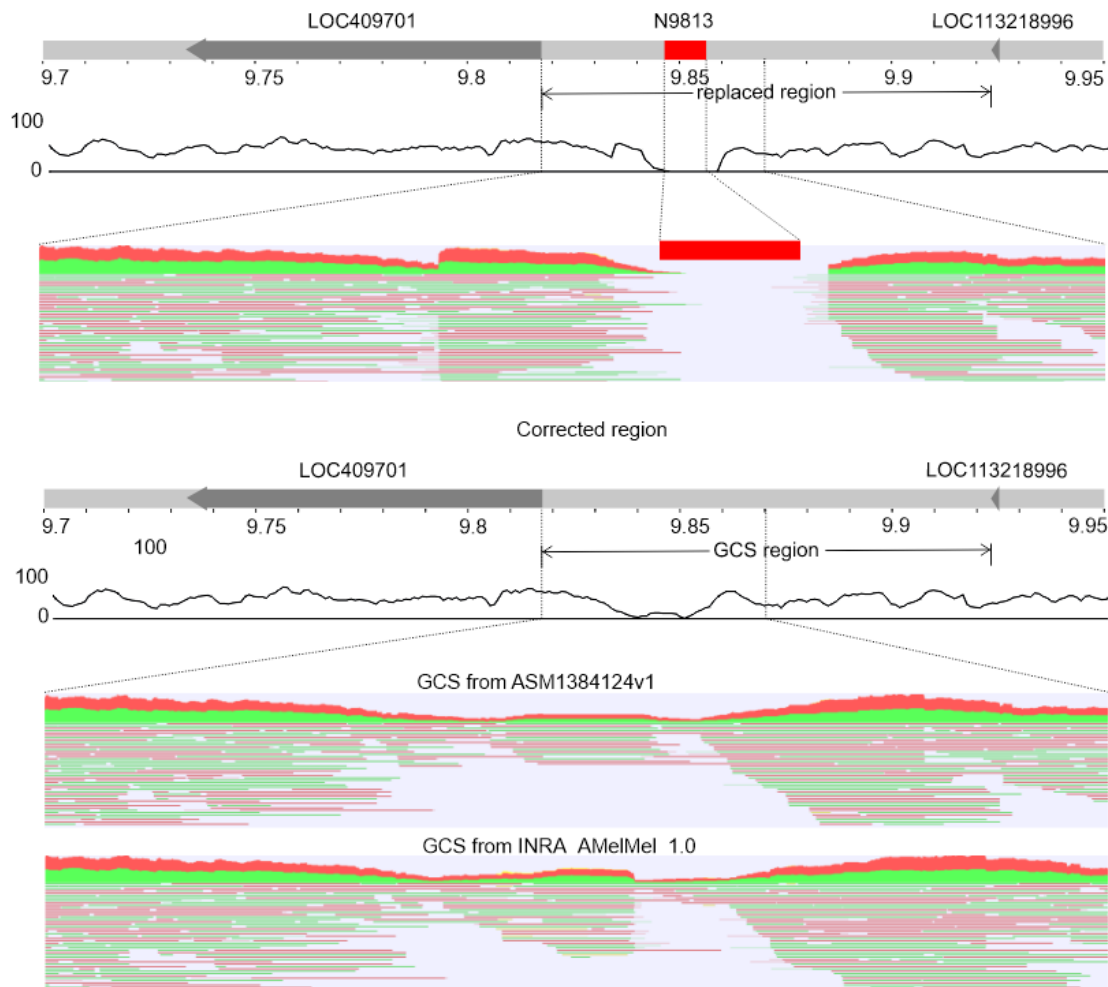

224

225 **Figure 4.** Gap closing sequence from ASM1384124v1 for the gap 2 of chromosome 1. The  
226 red square represents a gap, arrows - genes. The black curve under the chromosomes shows  
227 PacBio reads coverage. Red-green hatching shows alignments of long PacBio reads to the  
228 zoomed region.

229

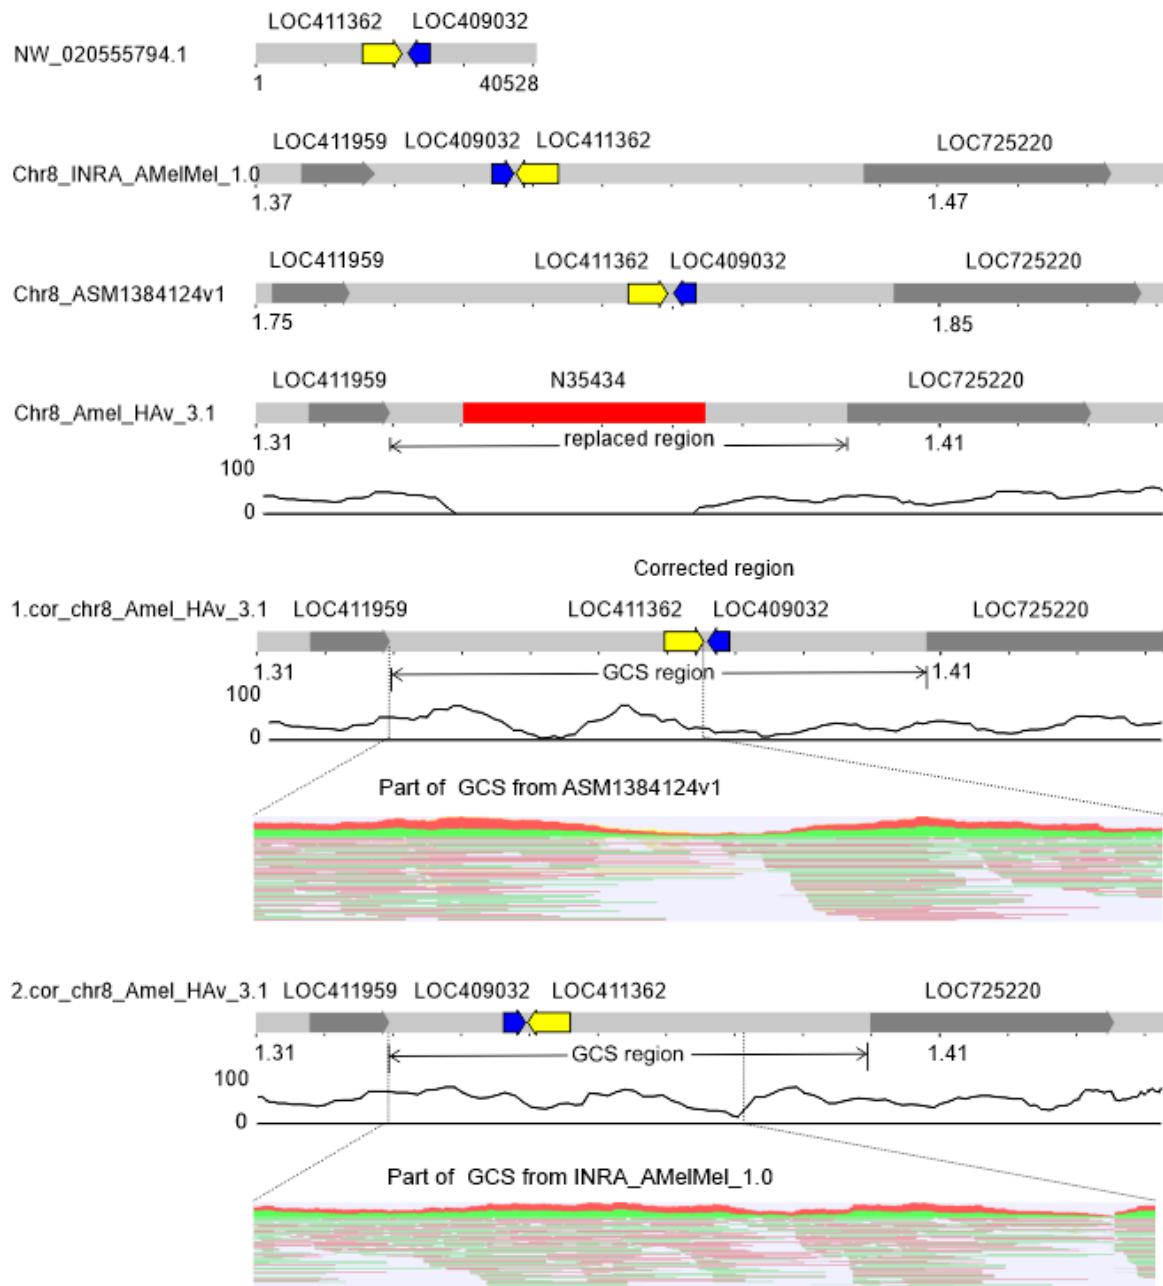

230

231 **Figure 5** Gap-closing sequence from NW\_020555794.1 for the gap 1 of chromosome 8. The

232 red square represents gaps, and the arrows represent genes. The black curve under the

233 chromosomes shows PacBio reads coverage. Red-green hatching shows alignments of long

234 PacBio reads to the zoomed region. 1.cor\_chr8\_Amel\_HAv\_3.1 is a gap-closing sequence

235 from ASM1384124v1, 2.cor\_chr8\_Amel\_HAv\_3.1 - from INRA\_AMelMel\_1.0.

236

237

238 Table 1 provides details of closed gaps and the corresponding GCSs. Six of the 13  
 239 gaps are located in genes and most of them have been closed by re-assembled  
 240 Amel\_HAv\_3.1.

241

242 **Table 1 Characteristics of gaps and corresponding GCSs**

| Gap (size, bp)          | Replaced region (size, bp)                                            | GCS source (size, bp)        |
|-------------------------|-----------------------------------------------------------------------|------------------------------|
| Chr1_gap2<br>(9,813)    | from the end of LOC409701 to the<br>start of LOC113218996 (106,010)   | ASM1384124v1 (105,996)       |
| Chr1_gap4<br>(1,978)    | from the end of LOC414039 to start of<br>LOC725387 (33,977)           | Amel_HAv3_1_reFlye (34,179)  |
| Chr1_gap6<br>(8,670)    | LOC410685 (64,235)                                                    | Amel_HAv3_1_reND (52,788)    |
| Chr1_gap8<br>(4,869)    | LOC410674 (142,134)                                                   | Amel_HAv3_1_reFlye (142,302) |
| Chr1_gap9<br>(25)       | LOC410785 (268,848)                                                   | Amel_HAv3_1_reFlye (266,084) |
| Chr2_gap1<br>(19,249)   | from the end LOC102656216 to the<br>start of LOC100577827 (128,592)   | Amel_HAv3_1_reND (121,580)   |
| Chr3_gap1<br>(25,238)   | LOC410967 (145,799)                                                   | ASM1384120v1 (139,551)       |
| Chr8_gap1<br>(35,434)   | from end of LOC411959 to the start of<br>LOC725220 (67,050)           | ASM1384124v1 (78,460)        |
| Chr8_gap3<br>(4,493)    | from the start of LOC100578698 to the<br>end of LOC100578828 (87,698) | Amel_HAv3_1_reFlye (92,821)  |
| Chr8_gap4<br>(2,636)    | AChE-2 (134,893)                                                      | Amel_HAv3_1_reND (134,907)   |
| Chr10_gap6<br>(158,704) | from the start of LOC102654940 to the<br>start of LOC409869 (200,539) | ASM1384124v1 (203,381)       |
| Chr16_gap1<br>(56,203)  | from the start of Mir993 to the start of<br>LOC410648 (136,683)       | Amel_HAv3_1_reND (142,661)   |
| Chr16_gap2<br>(25)      | LOC410655 (214,928)                                                   | Amel_HAv3_1_reFlye (221,629) |

243

## 244 **Telomere recovering and validation**

245 The Amel\_HAv\_3.1 contains almost all distal telomeres, except the telomeres of  
246 chromosomes 5 and 11 (Figure 6). In chromosome 5 of the Amel\_HAv\_3.1, the distance  
247 between the last gene (LOC409500) and the end of the chromosome is 7,405 bp, while it is  
248 19,481 bp in the INRA\_AMelMel\_1.0. Likewise, in chromosome 11 of the Amel\_HAv\_3.1,  
249 the distance between the LOC551454 and the end of the chromosome is 5,871 bp, while it is  
250 21,258 bp in the INRA\_AMelMel\_1.0. Besides, INRA\_AMelMel\_1.0. has another gene  
251 (LOC113219342) that comes after LOC551454. In the Amel\_HAv\_3.1, the LOC113219342  
252 is duplicated (Figure S4) and found in NW\_020555814.1 (associated with chromosome 10)  
253 and NW\_020555824.1 (13,259 bp, associated with chromosome 11). We used the telomeres  
254 of the alternative INRA\_AMelMel\_1.0 assembly to recover the telomeres lacking in the  
255 Amel\_HAv\_3.1 as shown in Figure 6. Then we mapped the PacBio reads to the corrected  
256 Amel\_HAv\_3.1 (Table 2).

257

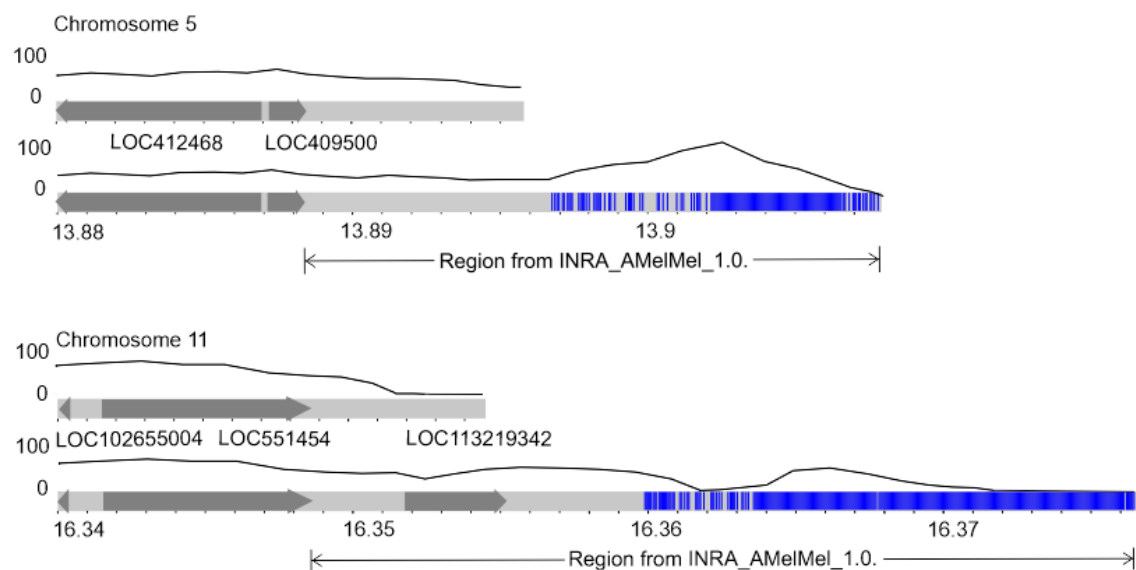

258

259 **Figure 6** Distal ends of chromosomes 5 and 11 in the reference Amel\_HAv\_3.1 before  
260 (upper) and after (lower) correction with the mapped telomeric TTAGG motifs (blue), genes  
261 (dark gray), and PacBio reads coverage (black curve).

262

263

## 264 **Redundancy removal and final corrected assembly assessment**

265 To identify redundant sequences, we aligned unplaced/unlocalized scaffolds to the  
266 corrected reference genome using Minimap2. We found that scaffolds NW\_020555860,

267 NW\_020555794.1, NW\_020555815.1, NW\_020555816.1, and NW\_020555824.1 aligned to  
268 the replaced regions. Therefore, these scaffolds were determined to be redundant and deleted  
269 from the corrected Amel\_HAv\_3.1.

270 We ran BUSCO 4.0 with hymenoptera\_odb10 and Liftoff to assess gene content in the  
271 corrected assembly (Table S6). The complete single-copy BUSCOs genes showed 0.4%  
272 increase, indicating a more complete assembly. Liftoff mapped all the reference genes, except  
273 the following three: LOC100578243, LOC113218760, and LOC113219414. These genes  
274 were, however, found to be in the genome using Minimap2 and represented duplicate genes  
275 (Figure S5).

276 We compared chromosome length (Table S7) and sequence coverage (Table 2) before  
277 and after gap closing. We observe improved coverage in almost all chromosomes except for  
278 chromosomes where telomeres have been added. Lack of improvement in such cases can be  
279 explained by the increased length of the chromosomes per number of reads.

280

281 **Table 2 Sequence coverage of the reference and corrected assemblies**

| Chr | Amel_HAv_3.1 |                  |                  | Corrected Amel_HAv_3.1 |                  |                  |
|-----|--------------|------------------|------------------|------------------------|------------------|------------------|
|     | ID           | Total read count | Average coverage | ID                     | Total read count | Average coverage |
| 1   | NC_037638.1  | 167,529          | 38.39            | cor_NC_037638.1        | 167,539          | 38.45            |
| 2   | NC_037639.1  | 96,598           | 38.16            | cor_NC_037639.1        | 96,696           | 38.23            |
| 3   | NC_037640.1  | 84,888           | 39.22            | cor_NC_037640.1        | 85,080           | 39.36            |
| 8   | NC_037645.1  | 75,555           | 37.85            | cor_NC_037645.1        | 75,835           | 38.02            |
| 10  | NC_037647.1  | 71,650           | 35.97            | cor_NC_037647.1        | 72,605           | 36.49            |
| 16  | NC_037653.1  | 43,400           | 38.32            | cor_NC_037653.1        | 45,829           | 38.50            |
| 5   | NC_037642.1  | 83,532           | 38.15            | cor_NC_037642.1        | 83,637           | 38.15            |
| 11  | NC_037648.1  | 100,362          | 39.19            | cor_NC_037648.1        | 100,433          | 39.16            |

282

## 283 CONCLUSIONS AND PERSPECTIVES

284 This study presents a gap-closing effort in the honey bee reference genome using the  
285 assembly-to-assembly approach (Zhao *et al.* 2020). We began by re-assembling the  
286 Amel\_HAv\_3.1 using two different assemblers. The obtained re-assembled genomes as well  
287 as three alternative assemblies allowed us to find gap closing sequences and significantly  
288 improve the honey bee reference genome. We confirmed the accuracy of the corrected  
289 assembly by means of gene annotation and through mapping long PacBio reads. This



290 approach has been successfully used for the human genome (Shi *et al.* 2016; Zhao *et al.*  
291 2020).

292 Altogether, we closed 13 genomic gaps (327,337 bp) out of 51 and recovered two  
293 distal telomeres (47,356 bp). Our work fixed five unplaced scaffolds (474,054 bp in total) and  
294 produced 3 gapless chromosomes in the corrected Amel\_HAv\_3.1 reference. Our  
295 comparative analysis of honey bee genome assemblies suggests that assemblies based on  
296 PacBio reads failed in the same highly repetitive extended regions, notably on chromosome  
297 10. Further work based on ultra-long Nanopore reads would be needed to fully resolve these  
298 extended repetitive regions.

299 Improving the reference genome of an organism is an important starting point in  
300 translating genomic information into its function at molecular, cellular, and organismal levels.  
301 We believe that our work on producing a more complete and accurate  
302 corrected\_Amel\_HAv\_3.1 reference will facilitate novel downstream inferences in the field of  
303 honey bee research, which start with technical steps such as reference-guided scaffolding,  
304 marker/sequence mapping, and alike.

305

## 306 **ACKNOWLEDGMENTS**

307 This study was supported by the Russian Foundation for Basic Research (project 19-  
308 54-70002) to A.N., U.Y., in part by the Ministry of Science and Higher Education of the  
309 Russian Federation (project No. AAAA-A21-121011990120-7) to M.K., Estonian Research  
310 Council grant PUT (PRG243), European Regional Development Fund (Project No. 2014-  
311 2020.4.01.16-0125), and ITMO University Fellowship to B.Y., and Eva Crane Trust Fund to  
312 B.H. and M.H.C.

313 Author contributions: U.Y. conceived and designed the experiments. M.K. and U.Y.  
314 performed bioinformatics analyses. M.K. and R.A. designed artworks. M.K., B.Y., R.R.,  
315 B.A.H., and U.Y. wrote the main manuscript text. A.N., B.A.H., M.H.C., and R.A. provided  
316 resources and laboratory space. All authors reviewed the manuscript.

317 All authors declare that they have no competing interests.

318

## 319 **LITERATURE CITED**

320 Alonge, M., S. Soyk, S. Ramakrishnan, X. Wang, S. Goodwin *et al.*, 2019 RaGOO: fast and  
321 accurate reference-guided scaffolding of draft genomes. *Genome Biol.* 20: 224.

322 Bayega, A., H. Djambazian, K. T. Tsoumani, M.-E. Gregoriou, E. Sagri *et al.*, 2020 De novo

- 323 assembly of the olive fruit fly (*Bactrocera oleae*) genome with linked-reads and long-  
324 read technologies minimizes gaps and provides exceptional Y chromosome assembly.  
325 *BMC Genomics* 21: 259.
- 326 Elsik, C. G., K. C. Worley, A. K. Bennett, M. Beye, F. Camara *et al.*, 2014 Finding the  
327 missing honey bee genes: lessons learned from a genome upgrade. *BMC Genomics* 15:  
328 86.
- 329 English, A. C., S. Richards, Y. Han, M. Wang, V. Vee *et al.*, 2012 Mind the gap: upgrading  
330 genomes with Pacific Biosciences RS long-read sequencing technology. *PLoS One* 7:  
331 e47768.
- 332 Harpur, B. A., M. M. Guarna, E. Huxter, H. Higo, K.-M. Moon *et al.*, 2019 Integrative  
333 Genomics Reveals the Genetics and Evolution of the Honey Bee's Social Immune  
334 System. *Genome Biol. Evol.* 11: 937–948.
- 335 Honeybee Genome Sequencing Consortium, 2006 Insights into social insects from the  
336 genome of the honeybee *Apis mellifera*. *Nature* 443: 931–949.
- 337 Hu, J., J. Fan, Z. Sun, and S. Liu, 2020 NextPolish: a fast and efficient genome polishing tool  
338 for long-read assembly. *Bioinformatics* 36: 2253–2255.
- 339 Kolmogorov, M., J. Yuan, Y. Lin, and P. A. Pevzner, 2019 Assembly of long, error-prone  
340 reads using repeat graphs. *Nat. Biotechnol.* 37: 540–546.
- 341 Li, H., 2018 Minimap2: pairwise alignment for nucleotide sequences. *Bioinformatics* 34:  
342 3094–3100.
- 343 Miga, K. H., S. Koren, A. Rhie, M. R. Vollger, A. Gershman *et al.*, 2020 Telomere-to-  
344 telomere assembly of a complete human X chromosome. *Nature* 585: 79–84.
- 345 Okonechnikov, K., O. Golosova, M. Fursov, and UGENE team, 2012 Unipro UGENE: a  
346 unified bioinformatics toolkit. *Bioinformatics* 28: 1166–1167.
- 347 Shi, L., Y. Guo, C. Dong, J. Huddleston, H. Yang *et al.*, 2016 Long-read sequencing and de  
348 novo assembly of a Chinese genome. *Nat. Commun.* 7: 12065.
- 349 Shumate, A., and S. L. Salzberg, 2020 Liftoff: accurate mapping of gene annotations.  
350 *Bioinformatics*.
- 351 Sloggett, C., N. Goonasekera, and E. Afgan, 2013 BioBlend: automating pipeline analyses  
352 within Galaxy and CloudMan. *Bioinformatics* 29: 1685–1686.
- 353 Thomma, B. P. H. J., M. F. Seidl, X. Shi-Kunne, D. E. Cook, M. D. Bolton *et al.*, 2016 Mind  
354 the gap; seven reasons to close fragmented genome assemblies. *Fungal Genet. Biol.* 90:  
355 24–30.
- 356 Wallberg, A., I. Bunikis, O. V. Pettersson, M.-B. Mosbech, A. K. Childers *et al.*, 2019 A

- 357 hybrid de novo genome assembly of the honeybee, *Apis mellifera*, with chromosome-  
358 length scaffolds. *BMC Genomics* 20: 275.
- 359 Waterhouse, R. M., M. Seppey, F. A. Simão, and E. M. Zdobnov, 2019 Using BUSCO to  
360 Assess Insect Genomic Resources, pp. 59–74 in *Insect Genomics: Methods and*  
361 *Protocols*, edited by S. J. Brown and M. E. Pfrender. Springer New York, New York,  
362 NY.
- 363 Zhao, T., Z. Duan, G. Z. Genchev, and H. Lu, 2020 Closing Human Reference Genome Gaps:  
364 Identifying and Characterizing Gap-Closing Sequences. *G3* 10: 2801–2809.
